# Supplementary material
Source: HighWire-hosted journal article supplement (https://www.life-science-alliance.org/content/6/3/e202201583/F3)
Supplement: inline-supplementary-material-2 [file inline-supplementary-material-2.pdf]

**A.**

Percentage cell population CD144-HLAG positive

|             | Control | Induced |
|-------------|---------|---------|
| Replicate 1 | 34.5    | 57.2    |
| Replicate 2 | 21      | 40.05   |
| Replicate 3 | 25      | 42      |

**B.**

Percentage cell population CD105-HLAG positive

|             | Control | Induced |
|-------------|---------|---------|
| Replicate 1 | 17.8    | 30.06   |
| Replicate 2 | 8.4     | 38      |
| Replicate 3 | 20      | 35      |
